# Supplementary material for: Antioxidant Artemisia princeps Extract Enhances the Expression of Filaggrin and Loricrin via the AHR/OVOL1 Pathway
Source: Int J Mol Sci. 2017 Sep 11;18(9):1948. doi: 10.3390/ijms18091948 (PMC5618597; doi:10.3390/ijms18091948)

Figure S1

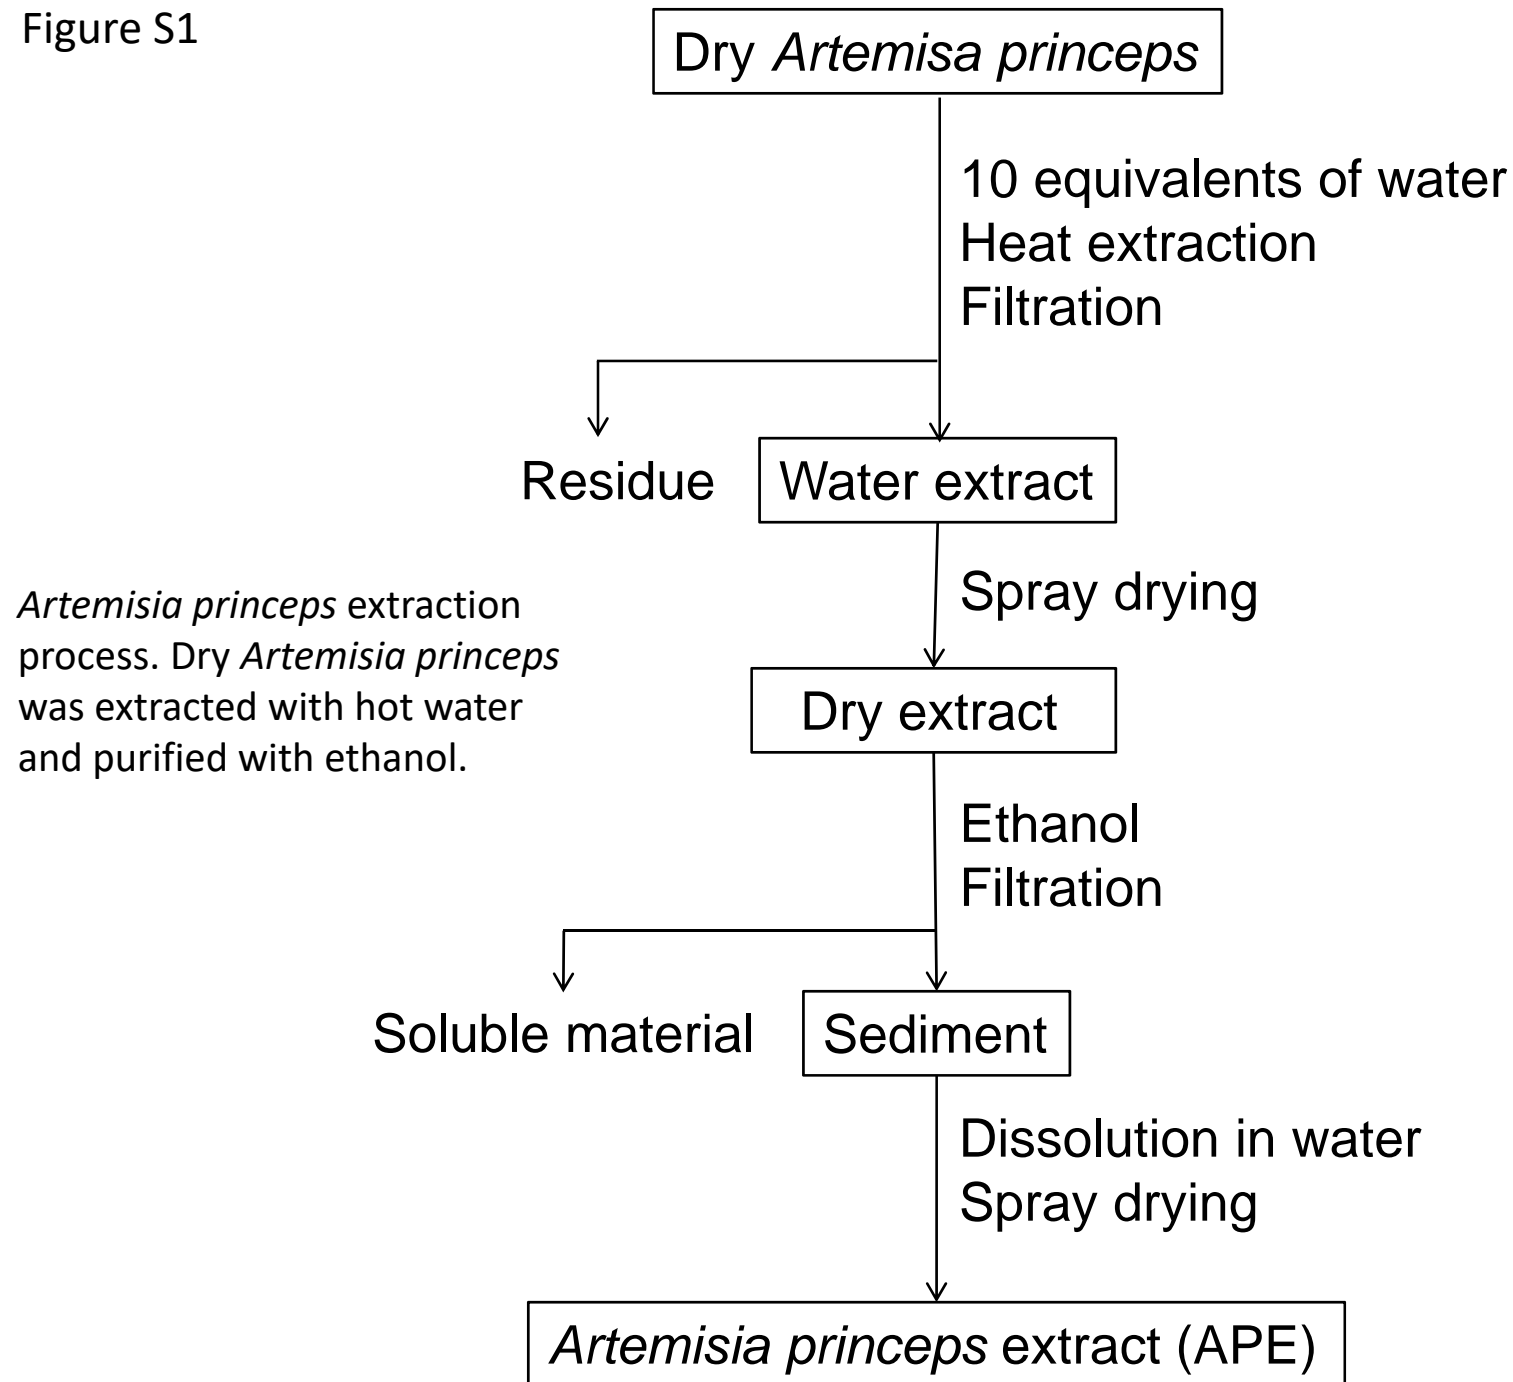

Figure S2

The viability of NHEKs was examined by cell toxicology analysis in graded concentrations of APE. NHEKs were constantly viable with APE  $\leq 0.03\%$ . Cell viability is shown as the mean  $\pm$  standard deviation. \*\*:  $P < 0.01$ .

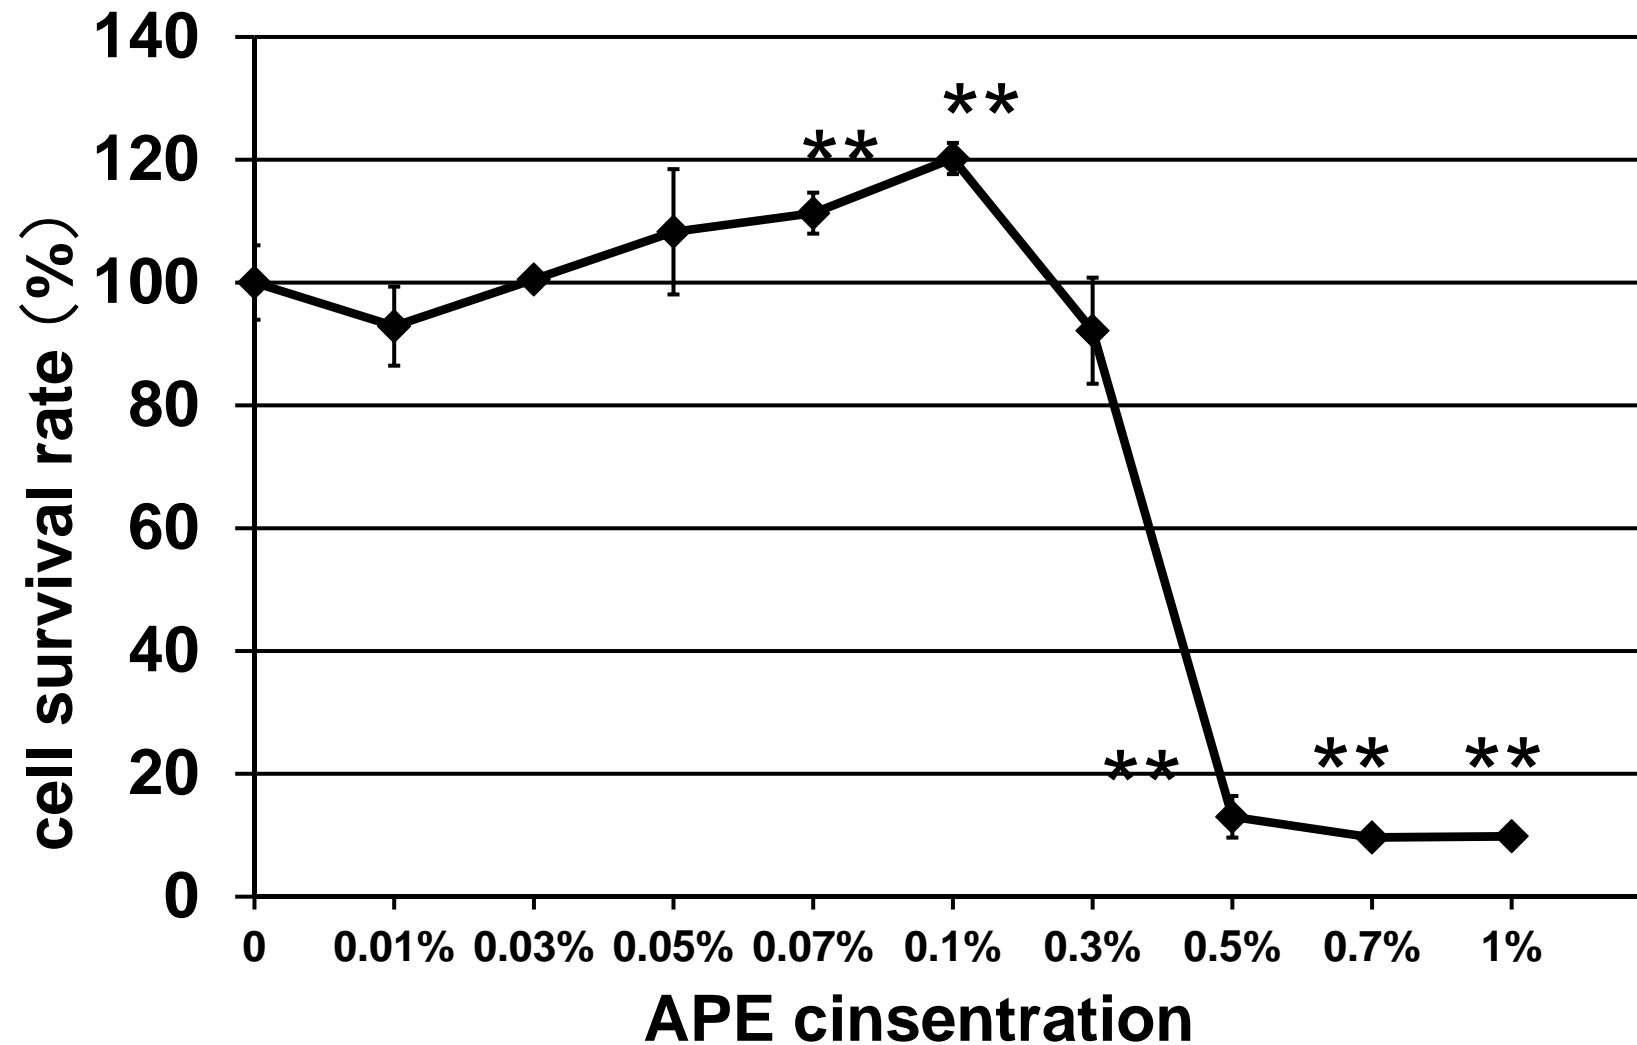

Figure S3

APE (0.03%)-induced OVOL1 upregulation is canceled in keratinocytes with AHR knockdown.

\*:  $P < 0.05$

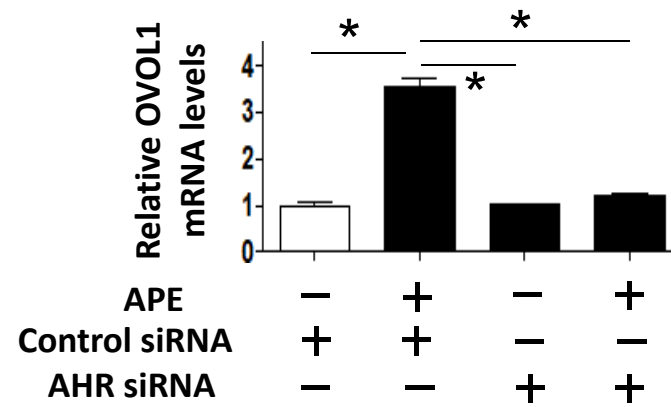

Figure S4

APE-induced NQO1 expression was only minimally downregulated in NHEKs transfected with AHR siRNA. Moreover, APE-induced HO1 expression was rather enhanced in AHR-knockdown NHEKs. \*:  $P < 0.05$ , \*\*:  $P < 0.01$

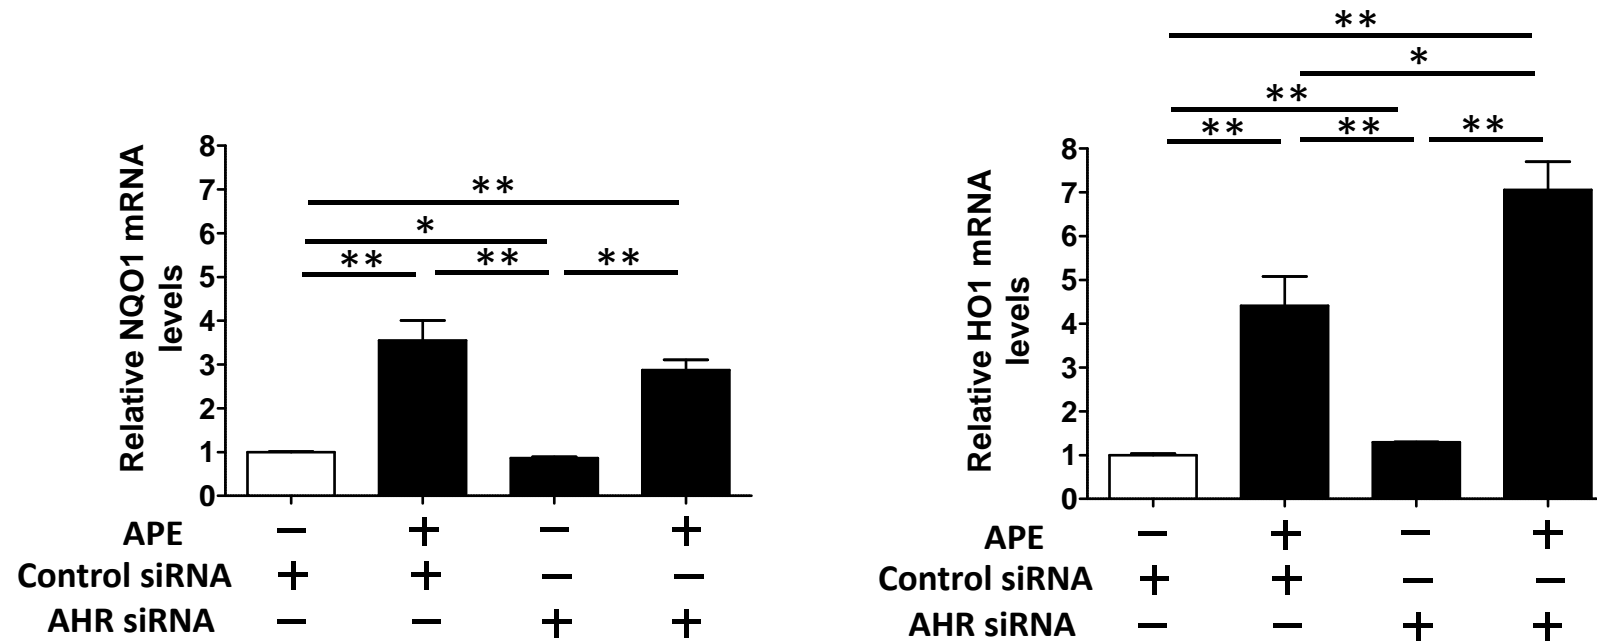

Supplement: Supplementary file 1 [file ijms-18-01948-s001.pdf]
